# Supplementary material for: Social Determinants of Narcotics Use Susceptibility among School-Attending Adolescents in Bissau, Guinea-Bissau: A Cross-Sectional Analysis
Source: MDPI journal article supplement (doi:10.3390/adolescents1030023), 2021-08-03
Supplement: s1 [file s1]

Archive with 1 entries (1 files):
- adolescents-1240313-supplementary.pdf
