# Supplementary material for: Social Determinants of Narcotics Use Susceptibility among School-Attending Adolescents in Bissau, Guinea-Bissau: A Cross-Sectional Analysis
Source: MDPI journal article supplement (doi:10.3390/adolescents1030023), 2021-08-03
Supplement: s1 [file s1 › adolescents-1240313-supplementary.pdf]

|               |                   |                                                                                                                               | Coefficients <sup>a</sup>   |            |                           |        |      |                                 |             |                        |                            |                     |
|---------------|-------------------|-------------------------------------------------------------------------------------------------------------------------------|-----------------------------|------------|---------------------------|--------|------|---------------------------------|-------------|------------------------|----------------------------|---------------------|
| Imputation    | Imputation Number | Model                                                                                                                         | Unstandardized Coefficients |            | Standardized Coefficients | t      | Sig. | 95.0% Confidence Interval for B |             | Fraction Missing Info. | Relative Increase Variance | Relative Efficiency |
|               |                   |                                                                                                                               | B                           | Std. Error | Beta                      |        |      | Lower Bound                     | Upper Bound |                        |                            |                     |
| Original data | 1                 | (Constant)                                                                                                                    | .365                        | .586       |                           | .623   | .534 | -.788                           | 1.518       |                        |                            |                     |
|               |                   | economiccrime                                                                                                                 | .321                        | .070       | .201                      | 4.585  | .000 | .183                            | .459        |                        |                            |                     |
|               |                   | recreationalbehaviour                                                                                                         | .039                        | .044       | .038                      | .888   | .375 | -.048                           | .127        |                        |                            |                     |
|               |                   | canabisriskperception                                                                                                         | .003                        | .017       | .008                      | .202   | .840 | -.030                           | .037        |                        |                            |                     |
|               |                   | violentcrime                                                                                                                  | .044                        | .047       | .045                      | .942   | .347 | -.048                           | .137        |                        |                            |                     |
|               |                   | peerinfluence                                                                                                                 | -.028                       | .028       | -.042                     | -1.011 | .313 | -.082                           | .026        |                        |                            |                     |
|               |                   | parentaloversight                                                                                                             | .027                        | .031       | .034                      | .853   | .394 | -.035                           | .088        |                        |                            |                     |
|               |                   | familysmoking                                                                                                                 | -.037                       | .035       | -.043                     | -1.066 | .287 | -.105                           | .031        |                        |                            |                     |
|               |                   | parreactalcholdrugs                                                                                                           | .000                        | .027       | .000                      | .005   | .996 | -.054                           | .054        |                        |                            |                     |
|               |                   | drinking                                                                                                                      | .414                        | .036       | .506                      | 11.541 | .000 | .343                            | .484        |                        |                            |                     |
|               |                   | domviolence                                                                                                                   | -.002                       | .046       | -.002                     | -.034  | .973 | -.093                           | .089        |                        |                            |                     |
|               |                   | q2b How old are you?                                                                                                          | -.005                       | .021       | -.010                     | -.231  | .818 | -.046                           | .037        |                        |                            |                     |
|               |                   | gender                                                                                                                        | -.063                       | .049       | -.052                     | -1.290 | .198 | -.159                           | .033        |                        |                            |                     |
|               |                   | Q38a Please state if and to what extent the following applies to your situation? My parents are poorly-off financially        | -.010                       | .021       | -.020                     | -.451  | .652 | -.052                           | .032        |                        |                            |                     |
|               |                   | Q73f How often, have you been involved in the following situations? Accused of a crime by the police that you never committed | .006                        | .049       | .005                      | .115   | .908 | -.091                           | .103        |                        |                            |                     |
|               |                   | Q47j Have you experienced any of the following? The death of a friend                                                         | .061                        | .025       | .102                      | 2.397  | .017 | .011                            | .111        |                        |                            |                     |
|               |                   | Q12 If you were born in Guinea Bissau choose the region where you were born                                                   | .008                        | .055       | .006                      | .143   | .886 | -.100                           | .116        |                        |                            |                     |
|               |                   | Q14 Is the official language Portuguese spoken in your home?                                                                  | -.019                       | .039       | -.020                     | -.487  | .626 | -.095                           | .057        |                        |                            |                     |

|  |                                                                                                                          |       |      |       |        |      |       |       |  |  |  |
|--|--------------------------------------------------------------------------------------------------------------------------|-------|------|-------|--------|------|-------|-------|--|--|--|
|  | Q17 How well-off financially do you think your family is in comparison to others?                                        | -.014 | .022 | -.026 | -.628  | .531 | -.056 | .029  |  |  |  |
|  | Q26b How do the following statements apply to you? I am bored with studies                                               | .002  | .022 | .003  | .085   | .932 | -.042 | .046  |  |  |  |
|  | Q28 How likely do you think it is that you will attend university?                                                       | -.028 | .034 | -.033 | -.825  | .410 | -.096 | .039  |  |  |  |
|  | Q24a What have your grades been in Mathematics?                                                                          | -.015 | .010 | -.065 | -1.532 | .127 | -.035 | .004  |  |  |  |
|  | Q24b What have your grades been in Portuguese?                                                                           | .007  | .012 | .025  | .606   | .545 | -.017 | .032  |  |  |  |
|  | Q25b How many whole days have you been absent from school during the last 30 days because you skipped or cut classes?    | .072  | .039 | .083  | 1.850  | .065 | -.005 | .149  |  |  |  |
|  | Q25c How many whole days have you been absent from school during the last 30 days for other reasons?                     | -.040 | .025 | -.065 | -1.601 | .110 | -.090 | .009  |  |  |  |
|  | Q47p Have you experienced any of the following? Been dismissed from class, or sent to the disciplinary board             | -.042 | .031 | -.060 | -1.363 | .174 | -.103 | .019  |  |  |  |
|  | Q47k Have you experienced any of the following? A breakup with a boyfriend/girlfriend                                    | -.034 | .024 | -.062 | -1.414 | .158 | -.081 | .013  |  |  |  |
|  | Q33a How easy or hard would it be for you to receive the following from your friends? Caring and warmth                  | -.037 | .019 | -.086 | -2.001 | .046 | -.074 | -.001 |  |  |  |
|  | Q33b How easy or hard would it be for you to receive the following from your friends? Discussions about personal affairs | .000  | .019 | .001  | .026   | .979 | -.037 | .038  |  |  |  |
|  | Q4b Households with one biological parent                                                                                | -.003 | .051 | -.003 | -.069  | .945 | -.103 | .096  |  |  |  |

|  |                                                                                                                                        |       |      |       |       |      |       |      |  |  |  |
|--|----------------------------------------------------------------------------------------------------------------------------------------|-------|------|-------|-------|------|-------|------|--|--|--|
|  | Q47c Have you experienced any of the following? A separation or divorce of your parents                                                | .013  | .033 | .016  | .385  | .700 | -.052 | .077 |  |  |  |
|  | Q9Q10 Both parents work outside of the home                                                                                            | -.022 | .037 | -.025 | -.582 | .561 | -.095 | .052 |  |  |  |
|  | Q5Q7 Both parents educated                                                                                                             | .045  | .035 | .060  | 1.302 | .194 | -.023 | .114 |  |  |  |
|  | Q67c Please answer the following questions as they apply to you? Have you been a victim of sexual violence during the last 12 months   | .144  | .074 | .090  | 1.952 | .052 | -.001 | .289 |  |  |  |
|  | Q47r Have you experienced any of the following? Been a victim of sexual abuse                                                          | .033  | .052 | .027  | .625  | .533 | -.070 | .136 |  |  |  |
|  | Q47t Have you experienced any of the following? Experienced sexual abuse where an adult from outside the family was involved           | -.034 | .035 | -.043 | -.970 | .333 | -.104 | .035 |  |  |  |
|  | Q32e How easy or hard would it be for you to receive the following from your parents? Assistance with things                           | .035  | .018 | .080  | 1.911 | .057 | -.001 | .072 |  |  |  |
|  | Q51a Have you, during the last 12 months...? Moved to a different neighbourhood/community?                                             | -.042 | .068 | -.028 | -.615 | .539 | -.174 | .091 |  |  |  |
|  | Q51b Have you, during the last 12 months...? Changed schools                                                                           | .003  | .061 | .002  | .055  | .956 | -.117 | .124 |  |  |  |
|  | Q52a Have you, during the last 5 years...? Moved to a different neighbourhood/community                                                | -.004 | .027 | -.007 | -.156 | .876 | -.057 | .048 |  |  |  |
|  | Q52b Have you, during the last 5 years...? Changed schools                                                                             | .020  | .023 | .039  | .853  | .394 | -.026 | .066 |  |  |  |
|  | Q67a Please answer the following questions as they apply to you? Have you been a victim of physical violence during the last 12 months | .078  | .041 | .089  | 1.906 | .058 | -.003 | .160 |  |  |  |

|   |   |                                                                                                                                           |          |      |       |        |      |       |       |  |  |  |
|---|---|-------------------------------------------------------------------------------------------------------------------------------------------|----------|------|-------|--------|------|-------|-------|--|--|--|
| 1 | 1 | Q69c How often, during the last 12 months have you behaved in the following way? Been part of a group starting a fight with another group | .040     | .048 | .043  | .845   | .399 | -.054 | .135  |  |  |  |
|   |   | Q69d How often, during the last 12 months have you behaved in the following way? Been part of a group that teased another                 | -.020    | .042 | -.024 | -.476  | .634 | -.104 | .063  |  |  |  |
|   |   | Q69f How often, during the last 12 months have you behaved in the following way? Been in a group that was attacked by another group       | .075     | .035 | .097  | 2.146  | .033 | .006  | .144  |  |  |  |
|   |   | Private1 Private (1)                                                                                                                      | .066     | .058 | .055  | 1.147  | .252 | -.048 | .180  |  |  |  |
|   |   | (Constant)                                                                                                                                | .359     | .216 |       | 1.665  | .096 | -.064 | .783  |  |  |  |
|   |   | economiccrime                                                                                                                             | .184     | .024 | .153  | 7.783  | .000 | .138  | .230  |  |  |  |
|   |   | recreationalbehaviour                                                                                                                     | -.012    | .015 | -.012 | -.786  | .432 | -.042 | .018  |  |  |  |
|   |   | canabisriskperception                                                                                                                     | .005     | .007 | .011  | .745   | .457 | -.008 | .018  |  |  |  |
|   |   | violentcrime                                                                                                                              | .055     | .015 | .066  | 3.571  | .000 | .025  | .085  |  |  |  |
|   |   | peerinfluence                                                                                                                             | -.026    | .011 | -.036 | -2.264 | .024 | -.048 | -.003 |  |  |  |
|   |   | parentaloversight                                                                                                                         | .050     | .013 | .054  | 3.697  | .000 | .023  | .076  |  |  |  |
|   |   | familysmoking                                                                                                                             | .026     | .015 | .025  | 1.705  | .088 | -.004 | .056  |  |  |  |
|   |   | parreactalcholdrugs                                                                                                                       | -.016    | .011 | -.022 | -1.459 | .145 | -.037 | .005  |  |  |  |
|   |   | drinking                                                                                                                                  | .402     | .014 | .478  | 28.900 | .000 | .375  | .430  |  |  |  |
|   |   | domviolence                                                                                                                               | .003     | .017 | .003  | .172   | .863 | -.030 | .036  |  |  |  |
|   |   | q2b How old are you?                                                                                                                      | .001     | .009 | .002  | .154   | .877 | -.017 | .020  |  |  |  |
|   |   | gender                                                                                                                                    | -.064    | .022 | -.044 | -2.944 | .003 | -.106 | -.021 |  |  |  |
|   |   | Q38a Please state if and to what extent the following applies to your situation? My parents are poorly-off financially                    | 2.898E-5 | .008 | .000  | .003   | .997 | -.017 | .017  |  |  |  |
|   |   | Q73f How often, have you been involved in the following situations? Accused of a crime by the police that you never committed             | .029     | .017 | .028  | 1.706  | .088 | -.004 | .062  |  |  |  |

|  |                                                                                                                       |       |      |       |        |      |       |       |  |  |  |
|--|-----------------------------------------------------------------------------------------------------------------------|-------|------|-------|--------|------|-------|-------|--|--|--|
|  | Q47j Have you experienced any of the following? The death of a friend                                                 | .031  | .011 | .045  | 2.873  | .004 | .010  | .051  |  |  |  |
|  | Q12 If you were born in Guinea Bissau choose the region where you were born                                           | -.006 | .023 | -.004 | -.240  | .810 | -.051 | .039  |  |  |  |
|  | Q14 Is the official language Portuguese spoken in your home?                                                          | -.004 | .017 | -.003 | -.210  | .834 | -.036 | .029  |  |  |  |
|  | Q17 How well-off financially do you think your family is in comparison to others?                                     | .015  | .008 | .027  | 1.779  | .075 | -.002 | .031  |  |  |  |
|  | Q26b How do the following statements apply to you? I am bored with studies                                            | -.006 | .009 | -.010 | -.678  | .498 | -.023 | .011  |  |  |  |
|  | Q28 How likely do you think it is that you will attend university?                                                    | -.009 | .014 | -.009 | -.625  | .532 | -.036 | .018  |  |  |  |
|  | Q24a What have your grades been in Mathematics?                                                                       | -.009 | .005 | -.032 | -2.089 | .037 | -.018 | -.001 |  |  |  |
|  | Q24b What have your grades been in Portuguese?                                                                        | -.007 | .005 | -.023 | -1.457 | .145 | -.017 | .002  |  |  |  |
|  | Q25b How many whole days have you been absent from school during the last 30 days because you skipped or cut classes? | -.020 | .013 | -.024 | -1.509 | .132 | -.045 | .006  |  |  |  |
|  | Q25c How many whole days have you been absent from school during the last 30 days for other reasons?                  | -.019 | .009 | -.032 | -2.086 | .037 | -.036 | -.001 |  |  |  |
|  | Q47p Have you experienced any of the following? Been dismissed from class, or sent to the disciplinary board          | -.068 | .013 | -.085 | -5.275 | .000 | -.093 | -.043 |  |  |  |
|  | Q47k Have you experienced any of the following? A breakup with a boyfriend/girlfriend                                 | -.032 | .010 | -.052 | -3.324 | .001 | -.051 | -.013 |  |  |  |

|  |                                                                                                                                      |       |      |       |        |      |       |      |  |  |  |
|--|--------------------------------------------------------------------------------------------------------------------------------------|-------|------|-------|--------|------|-------|------|--|--|--|
|  | Q33a How easy or hard would it be for you to receive the following from your friends? Caring and warmth                              | -.002 | .008 | -.003 | -.218  | .828 | -.017 | .014 |  |  |  |
|  | Q33b How easy or hard would it be for you to receive the following from your friends? Discussions about personal affairs             | -.011 | .008 | -.019 | -1.252 | .211 | -.027 | .006 |  |  |  |
|  | Q4b Households with one biological parent                                                                                            | -.019 | .022 | -.012 | -.834  | .404 | -.062 | .025 |  |  |  |
|  | Q47c Have you experienced any of the following? A separation or divorce of your parents                                              | .002  | .013 | .003  | .174   | .862 | -.023 | .028 |  |  |  |
|  | Q9Q10 Both parents work outside of the home                                                                                          | -.002 | .016 | -.002 | -.134  | .894 | -.034 | .030 |  |  |  |
|  | Q5Q7 Both parents educated                                                                                                           | .036  | .015 | .041  | 2.444  | .015 | .007  | .065 |  |  |  |
|  | Q67c Please answer the following questions as they apply to you? Have you been a victim of sexual violence during the last 12 months | .036  | .020 | .033  | 1.815  | .070 | -.003 | .075 |  |  |  |
|  | Q47r Have you experienced any of the following? Been a victim of sexual abuse                                                        | .052  | .019 | .050  | 2.754  | .006 | .015  | .089 |  |  |  |
|  | Q47t Have you experienced any of the following? Experienced sexual abuse where an adult from outside the family was involved         | -.023 | .013 | -.029 | -1.710 | .088 | -.048 | .003 |  |  |  |
|  | Q32e How easy or hard would it be for you to receive the following from your parents? Assistance with things                         | .008  | .008 | .015  | .983   | .326 | -.008 | .023 |  |  |  |
|  | Q51a Have you, during the last 12 months...? Moved to a different neighbourhood/community?                                           | .019  | .027 | .011  | .712   | .477 | -.033 | .071 |  |  |  |
|  | Q51b Have you, during the last 12 months...? Changed schools                                                                         | .019  | .025 | .012  | .757   | .449 | -.030 | .068 |  |  |  |

|   |   |                                                                                                                                           |       |      |       |        |      |       |       |  |  |  |
|---|---|-------------------------------------------------------------------------------------------------------------------------------------------|-------|------|-------|--------|------|-------|-------|--|--|--|
|   |   | Q52a Have you, during the last 5 years...? Moved to a different neighbourhood/community                                                   | .020  | .011 | .029  | 1.821  | .069 | -.002 | .041  |  |  |  |
|   |   | Q52b Have you, during the last 5 years...? Changed schools                                                                                | -.002 | .009 | -.003 | -.178  | .859 | -.019 | .016  |  |  |  |
|   |   | Q67a Please answer the following questions as they apply to you? Have you been a victim of physical violence during the last 12 months    | .064  | .015 | .064  | 4.173  | .000 | .034  | .094  |  |  |  |
|   |   | Q69c How often, during the last 12 months have you behaved in the following way? Been part of a group starting a fight with another group | .044  | .019 | .045  | 2.291  | .022 | .006  | .081  |  |  |  |
|   |   | Q69d How often, during the last 12 months have you behaved in the following way? Been part of a group that teased another                 | .051  | .019 | .051  | 2.694  | .007 | .014  | .089  |  |  |  |
|   |   | Q69f How often, during the last 12 months have you behaved in the following way? Been in a group that was attacked by another group       | .102  | .017 | .111  | 6.027  | .000 | .069  | .135  |  |  |  |
|   |   | Private1 Private (1)                                                                                                                      | .052  | .025 | .036  | 2.109  | .035 | .004  | .100  |  |  |  |
| 2 | 1 | (Constant)                                                                                                                                | .413  | .216 |       | 1.914  | .056 | -.010 | .837  |  |  |  |
|   |   | economiccrime                                                                                                                             | .139  | .024 | .109  | 5.776  | .000 | .092  | .186  |  |  |  |
|   |   | recreationalbehaviour                                                                                                                     | .008  | .015 | .008  | .521   | .603 | -.021 | .037  |  |  |  |
|   |   | canabisriskperception                                                                                                                     | .002  | .007 | .004  | .247   | .805 | -.011 | .015  |  |  |  |
|   |   | violentcrime                                                                                                                              | .055  | .015 | .069  | 3.654  | .000 | .025  | .084  |  |  |  |
|   |   | peerinfluence                                                                                                                             | -.018 | .011 | -.026 | -1.650 | .099 | -.040 | .003  |  |  |  |
|   |   | parentaloversight                                                                                                                         | .043  | .013 | .048  | 3.228  | .001 | .017  | .069  |  |  |  |
|   |   | familysmoking                                                                                                                             | .023  | .015 | .022  | 1.469  | .142 | -.008 | .053  |  |  |  |
|   |   | parreactalcholdrugs                                                                                                                       | -.022 | .011 | -.031 | -2.019 | .044 | -.043 | -.001 |  |  |  |
|   |   | drinking                                                                                                                                  | .399  | .014 | .480  | 28.930 | .000 | .372  | .426  |  |  |  |
|   |   | domviolence                                                                                                                               | .026  | .017 | .027  | 1.547  | .122 | -.007 | .059  |  |  |  |
|   |   | q2b How old are you?                                                                                                                      | -.001 | .009 | -.001 | -.088  | .930 | -.019 | .017  |  |  |  |
|   |   | gender                                                                                                                                    | -.055 | .022 | -.038 | -2.549 | .011 | -.097 | -.013 |  |  |  |

|  |                                                                                                                               |       |      |       |        |      |       |       |  |  |  |
|--|-------------------------------------------------------------------------------------------------------------------------------|-------|------|-------|--------|------|-------|-------|--|--|--|
|  | Q38a Please state if and to what extent the following applies to your situation? My parents are poorly-off financially        | -.005 | .008 | -.009 | -.570  | .569 | -.021 | .012  |  |  |  |
|  | Q73f How often, have you been involved in the following situations? Accused of a crime by the police that you never committed | .041  | .017 | .040  | 2.429  | .015 | .008  | .074  |  |  |  |
|  | Q47j Have you experienced any of the following? The death of a friend                                                         | .011  | .011 | .017  | 1.087  | .277 | -.009 | .032  |  |  |  |
|  | Q12 If you were born in Guinea Bissau choose the region where you were born                                                   | -.030 | .023 | -.019 | -1.294 | .196 | -.075 | .015  |  |  |  |
|  | Q14 Is the official language Portuguese spoken in your home?                                                                  | -.001 | .017 | -.001 | -.047  | .962 | -.034 | .032  |  |  |  |
|  | Q17 How well-off financially do you think your family is in comparison to others?                                             | .003  | .008 | .006  | .405   | .686 | -.013 | .020  |  |  |  |
|  | Q26b How do the following statements apply to you? I am bored with studies                                                    | -.011 | .009 | -.020 | -1.280 | .201 | -.028 | .006  |  |  |  |
|  | Q28 How likely do you think it is that you will attend university?                                                            | -.002 | .014 | -.002 | -.159  | .874 | -.029 | .025  |  |  |  |
|  | Q24a What have your grades been in Mathematics?                                                                               | -.010 | .005 | -.033 | -2.133 | .033 | -.018 | -.001 |  |  |  |
|  | Q24b What have your grades been in Portuguese?                                                                                | -.003 | .005 | -.010 | -.622  | .534 | -.013 | .007  |  |  |  |
|  | Q25b How many whole days have you been absent from school during the last 30 days because you skipped or cut classes?         | .020  | .013 | .024  | 1.515  | .130 | -.006 | .045  |  |  |  |
|  | Q25c How many whole days have you been absent from school during the last 30 days for other reasons?                          | -.019 | .009 | -.032 | -2.077 | .038 | -.037 | -.001 |  |  |  |

|                                                                                                                                      |       |      |       |        |      |       |       |  |  |  |
|--------------------------------------------------------------------------------------------------------------------------------------|-------|------|-------|--------|------|-------|-------|--|--|--|
| Q47p Have you experienced any of the following? Been dismissed from class, or sent to the disciplinary board                         | -.047 | .012 | -.061 | -3.837 | .000 | -.071 | -.023 |  |  |  |
| Q47k Have you experienced any of the following? A breakup with a boyfriend/girlfriend                                                | -.036 | .010 | -.059 | -3.724 | .000 | -.055 | -.017 |  |  |  |
| Q33a How easy or hard would it be for you to receive the following from your friends? Caring and warmth                              | .006  | .008 | .012  | .740   | .460 | -.010 | .021  |  |  |  |
| Q33b How easy or hard would it be for you to receive the following from your friends? Discussions about personal affairs             | -.009 | .008 | -.017 | -1.066 | .286 | -.026 | .008  |  |  |  |
| Q4b Households with one biological parent                                                                                            | .001  | .022 | .001  | .044   | .965 | -.043 | .045  |  |  |  |
| Q47c Have you experienced any of the following? A separation or divorce of your parents                                              | .008  | .013 | .010  | .644   | .520 | -.017 | .033  |  |  |  |
| Q9Q10 Both parents work outside of the home                                                                                          | .005  | .016 | .005  | .325   | .745 | -.026 | .037  |  |  |  |
| Q5Q7 Both parents educated                                                                                                           | .015  | .015 | .018  | 1.039  | .299 | -.014 | .044  |  |  |  |
| Q67c Please answer the following questions as they apply to you? Have you been a victim of sexual violence during the last 12 months | .014  | .020 | .012  | .676   | .499 | -.026 | .054  |  |  |  |
| Q47r Have you experienced any of the following? Been a victim of sexual abuse                                                        | .036  | .019 | .032  | 1.849  | .065 | -.002 | .074  |  |  |  |
| Q47t Have you experienced any of the following? Experienced sexual abuse where an adult from outside the family was involved         | -.038 | .013 | -.049 | -2.931 | .003 | -.063 | -.013 |  |  |  |
| Q32e How easy or hard would it be for you to receive the following from your parents? Assistance with things                         | .022  | .008 | .043  | 2.759  | .006 | .006  | .038  |  |  |  |

|   |   |                                                                                                                                           |       |      |       |       |      |       |      |  |  |  |
|---|---|-------------------------------------------------------------------------------------------------------------------------------------------|-------|------|-------|-------|------|-------|------|--|--|--|
|   |   | Q51a Have you, during the last 12 months...? Moved to a different neighbourhood/community?                                                | .006  | .027 | .004  | .229  | .819 | -.046 | .058 |  |  |  |
|   |   | Q51b Have you, during the last 12 months...? Changed schools                                                                              | .003  | .024 | .002  | .113  | .910 | -.045 | .050 |  |  |  |
|   |   | Q52a Have you, during the last 5 years...? Moved to a different neighbourhood/community                                                   | .017  | .011 | .025  | 1.530 | .126 | -.005 | .039 |  |  |  |
|   |   | Q52b Have you, during the last 5 years...? Changed schools                                                                                | -.008 | .009 | -.014 | -.855 | .393 | -.025 | .010 |  |  |  |
|   |   | Q67a Please answer the following questions as they apply to you? Have you been a victim of physical violence during the last 12 months    | .078  | .015 | .086  | 5.185 | .000 | .048  | .107 |  |  |  |
|   |   | Q69c How often, during the last 12 months have you behaved in the following way? Been part of a group starting a fight with another group | .075  | .019 | .080  | 3.937 | .000 | .038  | .113 |  |  |  |
|   |   | Q69d How often, during the last 12 months have you behaved in the following way? Been part of a group that teased another                 | .040  | .020 | .041  | 2.030 | .042 | .001  | .079 |  |  |  |
|   |   | Q69f How often, during the last 12 months have you behaved in the following way? Been in a group that was attacked by another group       | .089  | .017 | .099  | 5.202 | .000 | .055  | .122 |  |  |  |
|   |   | Private1 Private (1)                                                                                                                      | .042  | .025 | .029  | 1.705 | .088 | -.006 | .090 |  |  |  |
| 3 | 1 | (Constant)                                                                                                                                | .536  | .215 |       | 2.491 | .013 | .114  | .959 |  |  |  |
|   |   | economiccrime                                                                                                                             | .181  | .025 | .142  | 7.321 | .000 | .133  | .230 |  |  |  |
|   |   | recreationalbehaviour                                                                                                                     | -.003 | .015 | -.003 | -.178 | .859 | -.032 | .027 |  |  |  |
|   |   | canabisriskperception                                                                                                                     | -.001 | .007 | -.003 | -.196 | .845 | -.014 | .012 |  |  |  |
|   |   | violentcrime                                                                                                                              | .066  | .015 | .081  | 4.507 | .000 | .037  | .094 |  |  |  |
|   |   | peerinfluence                                                                                                                             | -.011 | .011 | -.015 | -.955 | .340 | -.032 | .011 |  |  |  |
|   |   | parentaloversight                                                                                                                         | .045  | .013 | .051  | 3.382 | .001 | .019  | .071 |  |  |  |
|   |   | familysmoking                                                                                                                             | .021  | .015 | .020  | 1.363 | .173 | -.009 | .050 |  |  |  |

|  |                                                                                                                               |       |      |       |        |      |       |       |  |  |  |
|--|-------------------------------------------------------------------------------------------------------------------------------|-------|------|-------|--------|------|-------|-------|--|--|--|
|  | parreactalcholdrugs                                                                                                           | -.020 | .011 | -.028 | -1.817 | .069 | -.041 | .002  |  |  |  |
|  | drinking                                                                                                                      | .395  | .014 | .473  | 28.711 | .000 | .368  | .422  |  |  |  |
|  | domviolence                                                                                                                   | -.010 | .017 | -.011 | -.596  | .551 | -.043 | .023  |  |  |  |
|  | q2b How old are you?                                                                                                          | -.002 | .009 | -.004 | -.222  | .824 | -.020 | .016  |  |  |  |
|  | gender                                                                                                                        | -.072 | .021 | -.051 | -3.345 | .001 | -.114 | -.030 |  |  |  |
|  | Q38a Please state if and to what extent the following applies to your situation? My parents are poorly-off financially        | -.008 | .008 | -.015 | -.968  | .333 | -.024 | .008  |  |  |  |
|  | Q73f How often, have you been involved in the following situations? Accused of a crime by the police that you never committed | .001  | .016 | .001  | .085   | .932 | -.030 | .033  |  |  |  |
|  | Q47j Have you experienced any of the following? The death of a friend                                                         | .005  | .011 | .007  | .454   | .650 | -.016 | .026  |  |  |  |
|  | Q12 If you were born in Guinea Bissau choose the region where you were born                                                   | -.026 | .023 | -.017 | -1.137 | .256 | -.071 | .019  |  |  |  |
|  | Q14 Is the official language Portuguese spoken in your home?                                                                  | .004  | .017 | .003  | .213   | .831 | -.029 | .037  |  |  |  |
|  | Q17 How well-off financially do you think your family is in comparison to others?                                             | .005  | .008 | .009  | .616   | .538 | -.011 | .021  |  |  |  |
|  | Q26b How do the following statements apply to you? I am bored with studies                                                    | -.004 | .009 | -.008 | -.502  | .616 | -.022 | .013  |  |  |  |
|  | Q28 How likely do you think it is that you will attend university?                                                            | -.002 | .014 | -.002 | -.163  | .871 | -.029 | .025  |  |  |  |
|  | Q24a What have your grades been in Mathematics?                                                                               | -.008 | .004 | -.029 | -1.868 | .062 | -.017 | .000  |  |  |  |
|  | Q24b What have your grades been in Portuguese?                                                                                | -.005 | .005 | -.015 | -.929  | .353 | -.014 | .005  |  |  |  |

|  |                                                                                                                                      |       |      |       |        |      |       |       |  |  |  |
|--|--------------------------------------------------------------------------------------------------------------------------------------|-------|------|-------|--------|------|-------|-------|--|--|--|
|  | Q25b How many whole days have you been absent from school during the last 30 days because you skipped or cut classes?                | -.027 | .013 | -.035 | -2.179 | .029 | -.052 | -.003 |  |  |  |
|  | Q25c How many whole days have you been absent from school during the last 30 days for other reasons?                                 | -.012 | .009 | -.022 | -1.386 | .166 | -.030 | .005  |  |  |  |
|  | Q47p Have you experienced any of the following? Been dismissed from class, or sent to the disciplinary board                         | -.043 | .012 | -.057 | -3.486 | .001 | -.068 | -.019 |  |  |  |
|  | Q47k Have you experienced any of the following? A breakup with a boyfriend/girlfriend                                                | -.034 | .010 | -.056 | -3.469 | .001 | -.053 | -.015 |  |  |  |
|  | Q33a How easy or hard would it be for you to receive the following from your friends? Caring and warmth                              | .017  | .008 | .035  | 2.210  | .027 | .002  | .032  |  |  |  |
|  | Q33b How easy or hard would it be for you to receive the following from your friends? Discussions about personal affairs             | -.011 | .008 | -.020 | -1.323 | .186 | -.027 | .005  |  |  |  |
|  | Q4b Households with one biological parent                                                                                            | .006  | .022 | .004  | .252   | .801 | -.038 | .049  |  |  |  |
|  | Q47c Have you experienced any of the following? A separation or divorce of your parents                                              | .013  | .013 | .015  | .978   | .328 | -.013 | .038  |  |  |  |
|  | Q9Q10 Both parents work outside of the home                                                                                          | -.004 | .016 | -.004 | -.255  | .799 | -.036 | .027  |  |  |  |
|  | Q5Q7 Both parents educated                                                                                                           | .031  | .015 | .036  | 2.086  | .037 | .002  | .060  |  |  |  |
|  | Q67c Please answer the following questions as they apply to you? Have you been a victim of sexual violence during the last 12 months | .028  | .020 | .025  | 1.425  | .154 | -.011 | .066  |  |  |  |

|  |                                                                                                                                           |       |      |       |       |      |       |      |  |  |  |
|--|-------------------------------------------------------------------------------------------------------------------------------------------|-------|------|-------|-------|------|-------|------|--|--|--|
|  | Q47r Have you experienced any of the following? Been a victim of sexual abuse                                                             | .018  | .019 | .017  | .965  | .335 | -.019 | .056 |  |  |  |
|  | Q47t Have you experienced any of the following? Experienced sexual abuse where an adult from outside the family was involved              | -.012 | .013 | -.015 | -.930 | .352 | -.038 | .013 |  |  |  |
|  | Q32e How easy or hard would it be for you to receive the following from your parents? Assistance with things                              | -.001 | .008 | -.002 | -.152 | .879 | -.017 | .014 |  |  |  |
|  | Q51a Have you, during the last 12 months...? Moved to a different neighbourhood/community?                                                | .015  | .027 | .009  | .562  | .574 | -.037 | .067 |  |  |  |
|  | Q51b Have you, during the last 12 months...? Changed schools                                                                              | .005  | .025 | .003  | .184  | .854 | -.044 | .053 |  |  |  |
|  | Q52a Have you, during the last 5 years...? Moved to a different neighbourhood/community                                                   | .025  | .011 | .037  | 2.311 | .021 | .004  | .046 |  |  |  |
|  | Q52b Have you, during the last 5 years...? Changed schools                                                                                | -.002 | .009 | -.004 | -.239 | .811 | -.020 | .016 |  |  |  |
|  | Q67a Please answer the following questions as they apply to you? Have you been a victim of physical violence during the last 12 months    | .076  | .015 | .081  | 5.011 | .000 | .046  | .106 |  |  |  |
|  | Q69c How often, during the last 12 months have you behaved in the following way? Been part of a group starting a fight with another group | .097  | .019 | .102  | 5.118 | .000 | .060  | .135 |  |  |  |
|  | Q69d How often, during the last 12 months have you behaved in the following way? Been part of a group that teased another                 | .028  | .018 | .030  | 1.567 | .117 | -.007 | .064 |  |  |  |

|   |   |                                                                                                                                     |       |      |       |        |      |       |       |  |  |  |
|---|---|-------------------------------------------------------------------------------------------------------------------------------------|-------|------|-------|--------|------|-------|-------|--|--|--|
| 4 | 1 | Q69f How often, during the last 12 months have you behaved in the following way? Been in a group that was attacked by another group | .082  | .016 | .092  | 4.995  | .000 | .050  | .115  |  |  |  |
|   |   | Private1 Private (1)                                                                                                                | .035  | .025 | .025  | 1.427  | .154 | -.013 | .083  |  |  |  |
|   |   | (Constant)                                                                                                                          | .329  | .217 |       | 1.517  | .129 | -.096 | .754  |  |  |  |
|   |   | economiccrime                                                                                                                       | .189  | .024 | .153  | 7.799  | .000 | .141  | .236  |  |  |  |
|   |   | recreationalbehaviour                                                                                                               | -.014 | .015 | -.014 | -.908  | .364 | -.043 | .016  |  |  |  |
|   |   | canabisriskperception                                                                                                               | -.005 | .007 | -.010 | -.693  | .488 | -.018 | .008  |  |  |  |
|   |   | violentcrime                                                                                                                        | .056  | .015 | .069  | 3.744  | .000 | .027  | .085  |  |  |  |
|   |   | peerinfluence                                                                                                                       | -.013 | .011 | -.019 | -1.207 | .228 | -.035 | .008  |  |  |  |
|   |   | parentaloversight                                                                                                                   | .034  | .013 | .038  | 2.544  | .011 | .008  | .061  |  |  |  |
|   |   | familysmoking                                                                                                                       | .032  | .015 | .031  | 2.132  | .033 | .003  | .062  |  |  |  |
|   |   | parreactalcholdrugs                                                                                                                 | -.012 | .011 | -.016 | -1.069 | .285 | -.033 | .010  |  |  |  |
|   |   | drinking                                                                                                                            | .386  | .014 | .464  | 27.620 | .000 | .359  | .413  |  |  |  |
|   |   | domviolence                                                                                                                         | -.003 | .017 | -.003 | -.176  | .860 | -.036 | .030  |  |  |  |
|   |   | q2b How old are you?                                                                                                                | -.005 | .009 | -.010 | -.597  | .551 | -.024 | .013  |  |  |  |
|   |   | gender                                                                                                                              | -.058 | .021 | -.041 | -2.697 | .007 | -.099 | -.016 |  |  |  |
|   |   | Q38a Please state if and to what extent the following applies to your situation? My parents are poorly-off financially              | -.005 | .008 | -.009 | -.555  | .579 | -.021 | .012  |  |  |  |
|   |   | Q73f How often, have you been involved in the following situations? Accused of a crime by the police that you never committed       | .036  | .016 | .036  | 2.185  | .029 | .004  | .068  |  |  |  |
|   |   | Q47j Have you experienced any of the following? The death of a friend                                                               | .016  | .011 | .024  | 1.520  | .129 | -.005 | .037  |  |  |  |
|   |   | Q12 If you were born in Guinea Bissau choose the region where you were born                                                         | -.032 | .023 | -.021 | -1.396 | .163 | -.077 | .013  |  |  |  |
|   |   | Q14 Is the official language Portuguese spoken in your home?                                                                        | .009  | .017 | .009  | .572   | .568 | -.023 | .042  |  |  |  |

|  |                                                                                                                          |       |      |       |        |      |       |       |  |  |  |
|--|--------------------------------------------------------------------------------------------------------------------------|-------|------|-------|--------|------|-------|-------|--|--|--|
|  | Q17 How well-off financially do you think your family is in comparison to others?                                        | .005  | .008 | .010  | .638   | .524 | -.011 | .021  |  |  |  |
|  | Q26b How do the following statements apply to you? I am bored with studies                                               | -.009 | .009 | -.016 | -1.047 | .295 | -.026 | .008  |  |  |  |
|  | Q28 How likely do you think it is that you will attend university?                                                       | .001  | .014 | .001  | .098   | .922 | -.026 | .028  |  |  |  |
|  | Q24a What have your grades been in Mathematics?                                                                          | -.006 | .004 | -.022 | -1.383 | .167 | -.015 | .003  |  |  |  |
|  | Q24b What have your grades been in Portuguese?                                                                           | -.005 | .005 | -.017 | -1.104 | .270 | -.015 | .004  |  |  |  |
|  | Q25b How many whole days have you been absent from school during the last 30 days because you skipped or cut classes?    | .017  | .013 | .022  | 1.297  | .195 | -.008 | .042  |  |  |  |
|  | Q25c How many whole days have you been absent from school during the last 30 days for other reasons?                     | -.007 | .009 | -.012 | -.785  | .433 | -.025 | .011  |  |  |  |
|  | Q47p Have you experienced any of the following? Been dismissed from class, or sent to the disciplinary board             | -.037 | .012 | -.049 | -2.961 | .003 | -.061 | -.012 |  |  |  |
|  | Q47k Have you experienced any of the following? A breakup with a boyfriend/girlfriend                                    | -.035 | .010 | -.057 | -3.589 | .000 | -.053 | -.016 |  |  |  |
|  | Q33a How easy or hard would it be for you to receive the following from your friends? Caring and warmth                  | .003  | .008 | .007  | .420   | .675 | -.012 | .019  |  |  |  |
|  | Q33b How easy or hard would it be for you to receive the following from your friends? Discussions about personal affairs | -.006 | .008 | -.012 | -.778  | .437 | -.023 | .010  |  |  |  |
|  | Q4b Households with one biological parent                                                                                | -.002 | .022 | -.001 | -.073  | .942 | -.045 | .041  |  |  |  |

|  |                                                                                                                                        |        |      |       |        |      |       |       |  |  |  |
|--|----------------------------------------------------------------------------------------------------------------------------------------|--------|------|-------|--------|------|-------|-------|--|--|--|
|  | Q47c Have you experienced any of the following? A separation or divorce of your parents                                                | -0.001 | .013 | -.002 | -.095  | .924 | -.026 | .024  |  |  |  |
|  | Q9Q10 Both parents work outside of the home                                                                                            | -.007  | .016 | -.007 | -.457  | .648 | -.039 | .024  |  |  |  |
|  | Q5Q7 Both parents educated                                                                                                             | .025   | .015 | .029  | 1.680  | .093 | -.004 | .054  |  |  |  |
|  | Q67c Please answer the following questions as they apply to you? Have you been a victim of sexual violence during the last 12 months   | .027   | .020 | .024  | 1.392  | .164 | -.011 | .065  |  |  |  |
|  | Q47r Have you experienced any of the following? Been a victim of sexual abuse                                                          | .097   | .019 | .092  | 5.065  | .000 | .060  | .135  |  |  |  |
|  | Q47t Have you experienced any of the following? Experienced sexual abuse where an adult from outside the family was involved           | -.045  | .013 | -.059 | -3.448 | .001 | -.071 | -.019 |  |  |  |
|  | Q32e How easy or hard would it be for you to receive the following from your parents? Assistance with things                           | .014   | .008 | .028  | 1.757  | .079 | -.002 | .029  |  |  |  |
|  | Q51a Have you, during the last 12 months...? Moved to a different neighbourhood/community?                                             | .006   | .026 | .004  | .229   | .819 | -.046 | .058  |  |  |  |
|  | Q51b Have you, during the last 12 months...? Changed schools                                                                           | -.005  | .025 | -.003 | -.202  | .840 | -.053 | .043  |  |  |  |
|  | Q52a Have you, during the last 5 years...? Moved to a different neighbourhood/community                                                | .004   | .011 | .007  | .419   | .675 | -.017 | .025  |  |  |  |
|  | Q52b Have you, during the last 5 years...? Changed schools                                                                             | .005   | .009 | .010  | .599   | .549 | -.012 | .023  |  |  |  |
|  | Q67a Please answer the following questions as they apply to you? Have you been a victim of physical violence during the last 12 months | .085   | .016 | .088  | 5.405  | .000 | .054  | .116  |  |  |  |

|   |   |                                                                                                                                           |       |      |       |        |      |       |       |  |  |  |
|---|---|-------------------------------------------------------------------------------------------------------------------------------------------|-------|------|-------|--------|------|-------|-------|--|--|--|
|   |   | Q69c How often, during the last 12 months have you behaved in the following way? Been part of a group starting a fight with another group | .004  | .019 | .004  | .216   | .829 | -.033 | .041  |  |  |  |
|   |   | Q69d How often, during the last 12 months have you behaved in the following way? Been part of a group that teased another                 | .076  | .018 | .078  | 4.108  | .000 | .040  | .112  |  |  |  |
|   |   | Q69f How often, during the last 12 months have you behaved in the following way? Been in a group that was attacked by another group       | .103  | .017 | .114  | 6.086  | .000 | .070  | .137  |  |  |  |
|   |   | Private1 Private (1)                                                                                                                      | .062  | .024 | .044  | 2.556  | .011 | .014  | .109  |  |  |  |
| 5 | 1 | (Constant)                                                                                                                                | .485  | .217 |       | 2.234  | .026 | .059  | .911  |  |  |  |
|   |   | economiccrime                                                                                                                             | .163  | .025 | .123  | 6.479  | .000 | .114  | .212  |  |  |  |
|   |   | recreationalbehaviour                                                                                                                     | -.010 | .015 | -.010 | -.652  | .515 | -.040 | .020  |  |  |  |
|   |   | canabisriskperception                                                                                                                     | -.001 | .007 | -.003 | -.223  | .824 | -.015 | .012  |  |  |  |
|   |   | violentcrime                                                                                                                              | .064  | .015 | .079  | 4.228  | .000 | .034  | .093  |  |  |  |
|   |   | peerinfluence                                                                                                                             | -.023 | .011 | -.034 | -2.077 | .038 | -.045 | -.001 |  |  |  |
|   |   | parentaloversight                                                                                                                         | .036  | .014 | .039  | 2.621  | .009 | .009  | .062  |  |  |  |
|   |   | familysmoking                                                                                                                             | .021  | .016 | .021  | 1.382  | .167 | -.009 | .052  |  |  |  |
|   |   | parreactalcholdrugs                                                                                                                       | -.017 | .011 | -.023 | -1.519 | .129 | -.038 | .005  |  |  |  |
|   |   | drinking                                                                                                                                  | .393  | .014 | .466  | 27.900 | .000 | .366  | .421  |  |  |  |
|   |   | domviolence                                                                                                                               | .005  | .017 | .005  | .271   | .786 | -.028 | .037  |  |  |  |
|   |   | q2b How old are you?                                                                                                                      | -.007 | .009 | -.012 | -.762  | .446 | -.025 | .011  |  |  |  |
|   |   | gender                                                                                                                                    | -.058 | .022 | -.041 | -2.690 | .007 | -.101 | -.016 |  |  |  |
|   |   | Q38a Please state if and to what extent the following applies to your situation? My parents are poorly-off financially                    | .001  | .009 | .002  | .150   | .881 | -.015 | .018  |  |  |  |
|   |   | Q73f How often, have you been involved in the following situations? Accused of a crime by the police that you never committed             | .047  | .017 | .047  | 2.730  | .006 | .013  | .080  |  |  |  |

|  |                                                                                                                       |       |      |       |        |      |       |       |  |  |  |
|--|-----------------------------------------------------------------------------------------------------------------------|-------|------|-------|--------|------|-------|-------|--|--|--|
|  | Q47j Have you experienced any of the following? The death of a friend                                                 | .023  | .011 | .035  | 2.164  | .031 | .002  | .044  |  |  |  |
|  | Q12 If you were born in Guinea Bissau choose the region where you were born                                           | -.002 | .023 | -.001 | -.084  | .933 | -.048 | .044  |  |  |  |
|  | Q14 Is the official language Portuguese spoken in your home?                                                          | -.007 | .017 | -.007 | -.443  | .658 | -.040 | .026  |  |  |  |
|  | Q17 How well-off financially do you think your family is in comparison to others?                                     | .008  | .008 | .014  | .896   | .370 | -.009 | .024  |  |  |  |
|  | Q26b How do the following statements apply to you? I am bored with studies                                            | -.002 | .009 | -.004 | -.256  | .798 | -.020 | .015  |  |  |  |
|  | Q28 How likely do you think it is that you will attend university?                                                    | -.003 | .014 | -.003 | -.201  | .840 | -.030 | .024  |  |  |  |
|  | Q24a What have your grades been in Mathematics?                                                                       | -.007 | .004 | -.026 | -1.659 | .097 | -.016 | .001  |  |  |  |
|  | Q24b What have your grades been in Portuguese?                                                                        | -.007 | .005 | -.023 | -1.439 | .150 | -.017 | .003  |  |  |  |
|  | Q25b How many whole days have you been absent from school during the last 30 days because you skipped or cut classes? | .014  | .013 | .018  | 1.067  | .286 | -.012 | .039  |  |  |  |
|  | Q25c How many whole days have you been absent from school during the last 30 days for other reasons?                  | -.006 | .009 | -.011 | -.686  | .493 | -.025 | .012  |  |  |  |
|  | Q47p Have you experienced any of the following? Been dismissed from class, or sent to the disciplinary board          | -.046 | .013 | -.061 | -3.669 | .000 | -.071 | -.022 |  |  |  |
|  | Q47k Have you experienced any of the following? A breakup with a boyfriend/girlfriend                                 | -.039 | .010 | -.063 | -3.959 | .000 | -.058 | -.019 |  |  |  |

|  |                                                                                                                                      |       |      |       |        |      |       |       |  |  |  |
|--|--------------------------------------------------------------------------------------------------------------------------------------|-------|------|-------|--------|------|-------|-------|--|--|--|
|  | Q33a How easy or hard would it be for you to receive the following from your friends? Caring and warmth                              | .003  | .008 | .007  | .446   | .655 | -.012 | .019  |  |  |  |
|  | Q33b How easy or hard would it be for you to receive the following from your friends? Discussions about personal affairs             | -.010 | .009 | -.018 | -1.137 | .256 | -.027 | .007  |  |  |  |
|  | Q4b Households with one biological parent                                                                                            | .002  | .022 | .001  | .094   | .925 | -.042 | .046  |  |  |  |
|  | Q47c Have you experienced any of the following? A separation or divorce of your parents                                              | .010  | .013 | .012  | .742   | .458 | -.016 | .035  |  |  |  |
|  | Q9Q10 Both parents work outside of the home                                                                                          | .008  | .016 | .008  | .514   | .607 | -.023 | .040  |  |  |  |
|  | Q5Q7 Both parents educated                                                                                                           | .017  | .015 | .020  | 1.116  | .264 | -.013 | .046  |  |  |  |
|  | Q67c Please answer the following questions as they apply to you? Have you been a victim of sexual violence during the last 12 months | .018  | .019 | .017  | .936   | .349 | -.020 | .056  |  |  |  |
|  | Q47r Have you experienced any of the following? Been a victim of sexual abuse                                                        | .029  | .019 | .027  | 1.503  | .133 | -.009 | .067  |  |  |  |
|  | Q47t Have you experienced any of the following? Experienced sexual abuse where an adult from outside the family was involved         | -.040 | .013 | -.050 | -2.958 | .003 | -.066 | -.013 |  |  |  |
|  | Q32e How easy or hard would it be for you to receive the following from your parents? Assistance with things                         | .019  | .008 | .037  | 2.320  | .020 | .003  | .034  |  |  |  |
|  | Q51a Have you, during the last 12 months...? Moved to a different neighbourhood/community?                                           | .027  | .027 | .016  | 1.002  | .317 | -.026 | .080  |  |  |  |
|  | Q51b Have you, during the last 12 months...? Changed schools                                                                         | .015  | .025 | .010  | .598   | .550 | -.034 | .063  |  |  |  |

|        |   |                                                                                                                                           |       |      |      |        |      |       |       |      |      |      |
|--------|---|-------------------------------------------------------------------------------------------------------------------------------------------|-------|------|------|--------|------|-------|-------|------|------|------|
|        |   | Q52a Have you, during the last 5 years...? Moved to a different neighbourhood/community                                                   | .010  | .011 | .016 | .956   | .339 | -.011 | .032  |      |      |      |
|        |   | Q52b Have you, during the last 5 years...? Changed schools                                                                                | .003  | .009 | .006 | .347   | .728 | -.015 | .021  |      |      |      |
|        |   | Q67a Please answer the following questions as they apply to you? Have you been a victim of physical violence during the last 12 months    | .059  | .016 | .061 | 3.786  | .000 | .028  | .090  |      |      |      |
|        |   | Q69c How often, during the last 12 months have you behaved in the following way? Been part of a group starting a fight with another group | .051  | .019 | .053 | 2.706  | .007 | .014  | .088  |      |      |      |
|        |   | Q69d How often, during the last 12 months have you behaved in the following way? Been part of a group that teased another                 | .068  | .019 | .070 | 3.570  | .000 | .031  | .106  |      |      |      |
|        |   | Q69f How often, during the last 12 months have you behaved in the following way? Been in a group that was attacked by another group       | .093  | .017 | .099 | 5.584  | .000 | .060  | .125  |      |      |      |
|        |   | Private1 Private (1)                                                                                                                      | .059  | .025 | .042 | 2.380  | .017 | .010  | .108  |      |      |      |
| Pooled | 1 | (Constant)                                                                                                                                | .425  | .236 |      | 1.800  | .074 | -.041 | .890  | .171 | .191 | .967 |
|        |   | economiccrime                                                                                                                             | .171  | .033 |      | 5.174  | .000 | .102  | .240  | .506 | .843 | .908 |
|        |   | recreationalbehaviour                                                                                                                     | -.006 | .018 |      | -.340  | .735 | -.042 | .030  | .318 | .409 | .940 |
|        |   | canabisriskperception                                                                                                                     | .000  | .008 |      | -.019  | .985 | -.016 | .015  | .286 | .354 | .946 |
|        |   | violentcrime                                                                                                                              | .059  | .016 |      | 3.671  | .000 | .027  | .091  | .138 | .150 | .973 |
|        |   | peerinfluence                                                                                                                             | -.018 | .013 |      | -1.386 | .172 | -.045 | .008  | .307 | .390 | .942 |
|        |   | parentaloversight                                                                                                                         | .042  | .015 |      | 2.731  | .008 | .011  | .072  | .239 | .283 | .954 |
|        |   | familysmoking                                                                                                                             | .025  | .016 |      | 1.521  | .129 | -.007 | .057  | .112 | .119 | .978 |
|        |   | parreactalcholdrugs                                                                                                                       | -.017 | .012 |      | -1.467 | .144 | -.040 | .006  | .141 | .154 | .973 |
|        |   | drinking                                                                                                                                  | .395  | .015 |      | 25.559 | .000 | .364  | .426  | .205 | .235 | .961 |
|        |   | domviolence                                                                                                                               | .004  | .022 |      | .183   | .857 | -.042 | .051  | .482 | .771 | .912 |
|        |   | q2b How old are you?                                                                                                                      | -.003 | .010 |      | -.281  | .779 | -.023 | .017  | .153 | .169 | .970 |
|        |   | gender                                                                                                                                    | -.061 | .023 |      | -2.695 | .007 | -.106 | -.017 | .108 | .115 | .979 |

|  |                                                                                                                               |       |      |  |        |      |       |      |      |       |      |
|--|-------------------------------------------------------------------------------------------------------------------------------|-------|------|--|--------|------|-------|------|------|-------|------|
|  | Q38a Please state if and to what extent the following applies to your situation? My parents are poorly-off financially        | -.003 | .009 |  | -.345  | .731 | -.022 | .015 | .215 | .249  | .959 |
|  | Q73f How often, have you been involved in the following situations? Accused of a crime by the police that you never committed | .031  | .026 |  | 1.203  | .252 | -.025 | .086 | .630 | 1.349 | .888 |
|  | Q47j Have you experienced any of the following? The death of a friend                                                         | .017  | .015 |  | 1.127  | .277 | -.015 | .050 | .571 | 1.070 | .898 |
|  | Q12 If you were born in Guinea Bissau choose the region where you were born                                                   | -.019 | .028 |  | -.686  | .497 | -.075 | .037 | .346 | .458  | .935 |
|  | Q14 Is the official language Portuguese spoken in your home?                                                                  | .000  | .018 |  | .014   | .989 | -.036 | .036 | .164 | .182  | .968 |
|  | Q17 How well-off financially do you think your family is in comparison to others?                                             | .007  | .010 |  | .746   | .459 | -.012 | .027 | .286 | .355  | .946 |
|  | Q26b How do the following statements apply to you? I am bored with studies                                                    | -.007 | .010 |  | -.684  | .495 | -.025 | .012 | .179 | .201  | .965 |
|  | Q28 How likely do you think it is that you will attend university?                                                            | -.003 | .014 |  | -.202  | .840 | -.031 | .025 | .078 | .082  | .985 |
|  | Q24a What have your grades been in Mathematics?                                                                               | -.008 | .005 |  | -1.718 | .087 | -.017 | .001 | .124 | .134  | .976 |
|  | Q24b What have your grades been in Portuguese?                                                                                | -.005 | .005 |  | -1.034 | .302 | -.016 | .005 | .143 | .156  | .972 |
|  | Q25b How many whole days have you been absent from school during the last 30 days because you skipped or cut classes?         | .001  | .028 |  | .023   | .983 | -.066 | .067 | .828 | 3.599 | .858 |
|  | Q25c How many whole days have you been absent from school during the last 30 days for other reasons?                          | -.013 | .011 |  | -1.128 | .268 | -.036 | .010 | .390 | .545  | .928 |

|  |                                                                                                                                      |           |      |  |        |       |       |       |      |       |      |
|--|--------------------------------------------------------------------------------------------------------------------------------------|-----------|------|--|--------|-------|-------|-------|------|-------|------|
|  | Q47p Have you experienced any of the following? Been dismissed from class, or sent to the disciplinary board                         | -.048     | .018 |  | -2.705 | .016  | -.086 | -.010 | .560 | 1.029 | .899 |
|  | Q47k Have you experienced any of the following? A breakup with a boyfriend/girlfriend                                                | -.035     | .010 |  | -3.491 | .001  | -.055 | -.015 | .068 | .071  | .987 |
|  | Q33a How easy or hard would it be for you to receive the following from your friends? Caring and warmth                              | .006      | .011 |  | .511   | .616  | -.017 | .029  | .538 | .948  | .903 |
|  | Q33b How easy or hard would it be for you to receive the following from your friends? Discussions about personal affairs             | -.009     | .009 |  | -1.083 | .279  | -.026 | .008  | .052 | .054  | .990 |
|  | Q4b Households with one biological parent                                                                                            | -.002     | .024 |  | -.094  | .925  | -.051 | .046  | .191 | .217  | .963 |
|  | Q47c Have you experienced any of the following? A separation or divorce of your parents                                              | .006      | .014 |  | .441   | .660  | -.022 | .035  | .200 | .228  | .962 |
|  | Q9Q10 Both parents work outside of the home                                                                                          | -9.550E-6 | .018 |  | -.001  | 1.000 | -.035 | .035  | .177 | .199  | .966 |
|  | Q5Q7 Both parents educated                                                                                                           | .025      | .018 |  | 1.393  | .171  | -.011 | .061  | .336 | .441  | .937 |
|  | Q67c Please answer the following questions as they apply to you? Have you been a victim of sexual violence during the last 12 months | .025      | .022 |  | 1.121  | .265  | -.019 | .068  | .204 | .235  | .961 |
|  | Q47r Have you experienced any of the following? Been a victim of sexual abuse                                                        | .047      | .039 |  | 1.198  | .270  | -.045 | .138  | .805 | 3.095 | .861 |
|  | Q47t Have you experienced any of the following? Experienced sexual abuse where an adult from outside the family was involved         | -.032     | .020 |  | -1.578 | .140  | -.075 | .012  | .623 | 1.309 | .889 |
|  | Q32e How easy or hard would it be for you to receive the following from your parents? Assistance with things                         | .012      | .013 |  | .952   | .362  | -.016 | .041  | .674 | 1.611 | .881 |

|  |                                                                                                                                           |       |      |  |       |      |       |      |      |       |      |
|--|-------------------------------------------------------------------------------------------------------------------------------------------|-------|------|--|-------|------|-------|------|------|-------|------|
|  | Q51a Have you, during the last 12 months...? Moved to a different neighbourhood/community?                                                | .015  | .028 |  | .515  | .607 | -.041 | .070 | .126 | .136  | .975 |
|  | Q51b Have you, during the last 12 months...? Changed schools                                                                              | .007  | .027 |  | .269  | .789 | -.046 | .060 | .164 | .182  | .968 |
|  | Q52a Have you, during the last 5 years...? Moved to a different neighbourhood/community                                                   | .015  | .014 |  | 1.099 | .282 | -.013 | .044 | .432 | .639  | .921 |
|  | Q52b Have you, during the last 5 years...? Changed schools                                                                                | -.001 | .011 |  | -.054 | .957 | -.022 | .021 | .299 | .376  | .944 |
|  | Q67a Please answer the following questions as they apply to you? Have you been a victim of physical violence during the last 12 months    | .072  | .019 |  | 3.760 | .001 | .033  | .112 | .400 | .568  | .926 |
|  | Q69c How often, during the last 12 months have you behaved in the following way? Been part of a group starting a fight with another group | .054  | .043 |  | 1.265 | .251 | -.050 | .159 | .847 | 4.104 | .855 |
|  | Q69d How often, during the last 12 months have you behaved in the following way? Been part of a group that teased another                 | .053  | .029 |  | 1.845 | .089 | -.009 | .115 | .620 | 1.291 | .890 |
|  | Q69f How often, during the last 12 months have you behaved in the following way? Been in a group that was attacked by another group       | .094  | .019 |  | 4.836 | .000 | .055  | .133 | .272 | .332  | .948 |
|  | Private1 Private (1)                                                                                                                      | .050  | .028 |  | 1.815 | .073 | -.005 | .105 | .220 | .256  | .958 |

a. Dependent Variable: tobalccanabisuse
